1 **Title:** Epidemiology of pediatric astrovirus gastroenteritis in a Nicaraguan birth cohort

2 **Running Title:** Astrovirus in community-dwelling Nicaraguan children

3

4 **Authors:** Rebecca J Rubinstein<sup>1</sup>, Yaoska Reyes<sup>2</sup>, Fredman González<sup>2</sup>, Lester  
5 Gutiérrez<sup>2</sup>, Christian Toval-Ruíz<sup>2</sup>, Kelli Hammond<sup>3</sup>, Lars Bode<sup>4</sup>, Jan Vinjé<sup>5</sup>, Samuel  
6 Vilchez<sup>2</sup>, Sylvia Becker-Dreps<sup>1,3</sup>, Filemón Bucardo<sup>2</sup>, Nadja A. Vielot<sup>3</sup>

7

8 **Affiliations:**

9 <sup>1</sup>Department of Epidemiology, University of North Carolina at Chapel Hill, Chapel Hill,  
10 NC, United States

11 <sup>2</sup>Center of Infectious Diseases, Department of Microbiology and Parasitology,  
12 Universidad Nacional Autónoma de Nicaragua—León, León, Nicaragua

13 <sup>3</sup>Department of Family Medicine, University of North Carolina at Chapel Hill, Chapel Hill,  
14 NC, United States

15 <sup>4</sup>Department of Pediatrics, University of California San Diego

16 <sup>5</sup>Division of Viral Diseases, Centers for Disease Control and Prevention, Atlanta,  
17 Georgia

18

19

20 **Word Count:** 3,499

21 **Abstract Word Count:** 250

22

23 **Disclaimer:** The findings and conclusions in this article are those of the authors and do  
24 not necessarily represent the official position of the CDC.

25

26 **Abstract:**

27 **Background:** Astrovirus is a leading cause of acute gastroenteritis in children  
28 worldwide. However, few prospective studies have analyzed astrovirus in community-  
29 dwelling pediatric populations in low-and-middle-income countries.

30 **Methods:** We assessed the incidence, risk factors, clinical characteristics, genotypes,  
31 viral coinfections and seasonality of astrovirus gastroenteritis in 443 healthy Nicaraguan  
32 children born in 2017-2018, followed for 36 months. Children were recruited from  
33 maternity hospitals and birth records in an economically-diverse neighborhood of León,  
34 the second-largest city in Nicaragua. Astrovirus-positive episodes and genotypes were  
35 identified from diarrheal specimens with reverse transcription quantitative polymerase  
36 chain reaction and Sanger sequencing.

37 **Results:** Of 1708 total specimens tested, eighty children (18%) experienced at least 1  
38 astrovirus episode, and 9 experienced repeat episodes, mostly during the rainy season  
39 (May-October). The incidence of astrovirus episodes was 7.8/100 child-years (95% CI:  
40 6.2, 9.8). Genotype-specific incidence of astrovirus also exhibited seasonality. Median  
41 age of astrovirus episode onset was 16 months (IQR 9, 23). Initial astrovirus episodes  
42 were not associated with protection against future episodes during the age span  
43 studied. Astrovirus cases were exclusively breastfed for a shorter period than uninfected  
44 children, and the human milk oligosaccharide lacto-N-fucopentaose-I was more  
45 concentrated in mothers of these children. Home toilets appeared to protect against  
46 future astrovirus episodes (HR=0.19, 95% CI 0.04-0.91). Human astrovirus-5 episodes,  
47 comprising 15% of all typed episodes, were associated with longer diarrhea and more  
48 symptomatic rotavirus co-infections.

49 **Conclusion:** Astrovirus was a common cause of gastroenteritis in this cohort, and  
50 future studies should clarify the role of astrovirus genotype in clinical infection severity.

51

52 **Key words:** birth cohort, astrovirus, Nicaragua, diarrhea, children

53

54 **Background:**

55 Human astroviruses are an important cause of acute gastroenteritis (AGE) worldwide,  
56 detected in 2-9% of all AGE cases in children under age 3[1]. Infections are typically  
57 self-limiting with 1-4 days of watery diarrhea, fever and abdominal pain[2], and rarely,  
58 extra-gastrointestinal infection and death in immunocompromised adults and  
59 children[3,4]. Astrovirus frequently appears as a co-infection with other enteric viral  
60 pathogens, especially rotavirus, norovirus and sapovirus[1,5]. Co-infections with other  
61 pathogens have also been associated with more severe gastroenteritis symptoms and  
62 greater likelihood of experiencing diarrhea in low-and-middle-income country (LMIC)  
63 settings[1,6], where incidence, morbidity and mortality from childhood gastroenteritis is  
64 highest.

65

66 Astroviruses are non-enveloped single-stranded positive-sense RNA viruses in the  
67 family *Astroviridae*. Enteric infections are primarily caused by human astrovirus (HAstV)  
68 types 1-8 in the *Mamastrovirus* genus, MAstV-1 species[4]. Like other RNA viruses,  
69 astrovirus has a high rate of evolution and recombination[7]. Consequently, additional

70 astroviruses, including the Melbourne (MLB) and Virginia (VA) types, were discovered  
71 with improved sequencing technology. Unlike HAstV 1-8 genotypes, the MLB and VA  
72 astroviruses are more closely related to animal astroviruses, and more commonly  
73 associated with extra-gastrointestinal infections in humans, especially neurological  
74 cases.

75

76 With few exceptions, most astrovirus studies in LMICs have been conducted in  
77 healthcare settings, limited to children with more severe clinical symptoms[1,6,9–12].  
78 These studies could potentially over-estimate typical symptom duration in astrovirus  
79 infection. Also, children presenting to healthcare settings may be wealthier and could  
80 bias estimates of risk factors for infections, as they do not represent the population as a  
81 whole, although this bias may be less pronounced in countries with universal  
82 healthcare, including Nicaragua. Cross-sectional studies of hospitalized children are  
83 also susceptible to recall bias if caregivers misreport the timing of risk factors and  
84 clinical symptoms. Community-based cohort studies may better represent the  
85 populations at risk for astrovirus and capture the full spectrum of disease severity and  
86 risk factors. However, investigations of astrovirus in prospective birth cohorts in Central  
87 America have not been conducted in over 20 years[6,10].

88

89 In a prospective cohort study with weekly follow-up over three years, we describe the  
90 incidence and risk factors for astrovirus acute gastroenteritis (AGE) in Nicaraguan  
91 children.

92

93 **Methods:**

94 *Study sample.* The Sapovirus Acute GastroEnteritis (SAGE) study is a population-based  
95 birth cohort of 444 mother-infant dyads in León, Nicaragua born between June 12, 2017  
96 and July 31, 2018 and followed until infants were 36 months old[13]. Children were  
97 recruited from maternity hospitals and birth registries in an economically-diverse  
98 neighborhood of León, the second-largest city in Nicaragua. Within 10-14 days of birth,  
99 field staff recorded sociodemographic characteristics of the infants (e.g., sex, birth  
100 history, breastfeeding) and households (e.g., floor construction, water source,  
101 sanitation). For 36 months, children were visited in their households weekly for AGE  
102 symptoms of vomiting and diarrhea, where acute diarrhea was defined as an increase in  
103 stool frequency to 3 stools per 24-hour period or a substantial change in stool  
104 consistency, such as bloody, very loose, or watery stool. A new AGE episode was  
105 defined as symptoms preceded by three days of no symptoms[13]. At weekly visits,  
106 mothers were asked if they had breastfed the child on the previous day, and at monthly  
107 visits, mothers were asked if their child had consumed uncooked fruits or vegetables,  
108 seafood, or other foods outside the home within the previous 7 days, and whether the  
109 child had attended social gatherings or had contact with anyone experiencing diarrhea  
110 or vomiting in or outside the home within the previous 7 days[13]. All participants'  
111 families provided informed consent for study participation and biobanking of samples for  
112 future research. All study materials were approved by the Ethical Committee for  
113 Biomedical Research at the Universidad Nacional Autónoma de Nicaragua—León  
114 (UNAN-León) (Acta #2-2017), the Institutional Review Board at the University of North

115 Carolina at Chapel Hill (protocol #16-2079), and the Centers for Disease Control in  
116 Atlanta (project ID: 0900f3eb81c526a7)[13,14].

117

118 *Astrovirus detection and genotyping.* When AGE was reported, a stool specimen was  
119 collected within two hours of defecation. Stool specimens were transported in a sterile  
120 plastic container or soiled diaper at 4°C to the Microbiology Department of UNAN-León  
121 and suspended in phosphate-buffered saline as previously described[13]. RNA was  
122 extracted from stool suspension using the The QIAamp Viral RNA Mini Kit (Qiagen,  
123 Valencia, California). Astrovirus-specific real-time PCR (RT-qPCR) reactions on the  
124 capsid gene were performed in a 96-well reaction plate using the Roche LightCycler®  
125 96 System (Roche, Foster, CA) using primers described by Liu and colleagues. RT-  
126 qPCR was performed under the following conditions: 45°C for 10 min, 95°C for 10 min,  
127 followed by 40 cycles of 95°C for 15 s and 60°C for 30 s as described previously[15].  
128 Samples with ct values  $\leq 38$  were considered positive for astrovirus, and the AGE  
129 episode during which the stool was collected was defined as an “astrovirus-episode”. All  
130 astrovirus-positive stool specimens were then re-amplified by conventional RT-PCR,  
131 positive samples with ct values  $\leq 35$  were Sanger-sequenced, and sequences were  
132 genotyped by comparing with astrovirus reference genotypes[16].

133

134 *Detection of viral co-infections in stool:* RNA from norovirus GI, norovirus GII, sapovirus,  
135 and rotavirus were detected via RT-qPCR as described previously[15,17,18]

136

137 *Human milk oligosaccharide (HMO) identification.* Manually-expelled breastmilk was  
138 analyzed for HMOs once from lactating mothers at approximately 2 months post-partum  
139 (range 1-4 months). Nineteen unique HMOs were extracted, identified, and quantified  
140 using fluorescent high-and-ultra-high-pressure liquid chromatography (HPLC-FL/UPLC)  
141 developed by the Bode Laboratory at the University of California, San Diego[19–21].  
142 HPLC-FL/UPLC uses mass concentration to distinguish between structural isomers and  
143 quantifies ~95% of all HMOs by concentration in breastmilk.

144

145 *Statistical analysis.* To analyze the molecular epidemiology and seasonal frequency of  
146 astrovirus in our cohort, we generated a monthly epidemic curve of astrovirus episodes  
147 and an epidemic curve by genotype.

148

149 We also compared potential risk factors and exposures for astrovirus AGE among  
150 children who did and did not develop astrovirus AGE (e.g. cases and non-cases) using  
151 a Mantel-Haenszel chi-squared test for frequencies (%) and a two-sample t-test for  
152 means and standard deviations. Exclusive breastfeeding was defined as the total  
153 number of weeks in which the mother breastfed the child, and during which the child  
154 had not yet consumed other foods or liquids. Any breastfeeding was defined as the total  
155 number of weeks in which the mother breastfed the child, regardless of whether the  
156 child consumed other foods or liquids.

157

158 We determined the relative hazard (95% CI) of children experiencing an astrovirus  
159 episode by baseline risk factors using a Cox proportional hazards model. We also  
160 assessed the relative hazard (95% CI) of astrovirus AGE by time-varying risk factors  
161 and exposures using a time-varying Cox model. We also compared clinical  
162 characteristics among different astrovirus genotypes using a nonparametric Kruskal-  
163 Wallis test for continuous variables and a Fisher's exact test of goodness-of-fit test for  
164 all categorical variables.

165  
166 Next, we compared clinical and epidemiological characteristics of individuals who  
167 developed multiple astrovirus episodes versus one episode. Gastroenteritis severity  
168 was assessed using a severity score described previously[13,22] that incorporates  
169 symptoms and their duration, and receipt of intravenous fluids. Frequencies (%) of  
170 categorical variables and medians (interquartile ranges) of continuous variables were  
171 compared. We also assessed the conditional relative hazard (95% CI) of a second  
172 astrovirus episode among children who experienced an initial astrovirus episode using a  
173 Prentice-Williams-Peterson model[23]. Alpha was set at 0.05 for all inferential tests, with  
174 no adjustment for multiple comparisons.

175

176

## 177 **Results:**

178 Of 444 children enrolled in the SAGE cohort, 443 completed the study; one child  
179 dropped out within the first 5 weeks and was excluded from subsequent analyses[14].



180 Among 1708 specimens tested, eighty (18%) of the remaining 443 children experienced  
181 at least 1 astrovirus AGE episode, and 9 children experienced multiple episodes. The  
182 443 children contributed 12,083 person-months of follow-up, and the incidence rate of  
183 astrovirus-specific AGE was 7.8/100 child-years (95% CI: 6.2, 9.8). The median age of  
184 astrovirus episode onset was 16 months (IQR 9, 23).

185 The majority of astrovirus episodes occurred during the rainy season (May-October) in  
186 the Pacific coastal region of Nicaragua[24], where León is located (Fig. 1a). No cases  
187 were documented during April, May (the start of the rainy season), or November (Fig.  
188 1a). The largest cluster occurred between June-September, 2019, with 45 episodes  
189 detected in June alone (Fig. 1a). The median (IQR) age of episode onset among  
190 children infected in June/July 2019 was 18 months (16-20), slightly older than children  
191 infected at other time points (14 months [9-22]).

192

193 The infecting genotype was determined in 61 of 89 astrovirus specimens. HAstV-1 was  
194 detected in 31 (51%) episodes (Fig 1b). Other genotypes included HAstV-2 (18%),  
195 HAstV-4 (13%), and HAstV-5 (15%). Only 1 episode of HAstV-3 and HAstV-8 was  
196 identified (1.6%).

197

198 Seasonality among the different astrovirus types was observed with HAstV-4 and  
199 HAstV-5 primarily prevalent in June-July of 2018 and January-February of 2019. In  
200 June-July, 2019 HAstV-1 and HAstV-2 were primarily detected (Fig.b). Episodes of  
201 astroviruses that could not be typed were similarly distributed across all months (Fig. b).

202

203 Few characteristics differed between astrovirus cases and non-cases (Table 1). Cases  
204 were exclusively breastfed for a shorter number of weeks than non-cases, though both  
205 groups were exclusively breastfed on average for fewer than 1 study visit (Table 1).  
206 Conversely, astrovirus cases were nonexclusively breastfed for longer than non-cases  
207 (82 versus 69 weeks), though this difference was not statistically significant (Table 1).  
208 Additionally, the breastmilk consumed by astrovirus cases had a greater concentration  
209 of the  $\alpha$ -1,2 fucosylated HMO lacto-N-fucopentaose-I (LNFP-I) (Table 1). Few  
210 characteristics were associated with time to first astrovirus episode (Table 2). Children  
211 who had contact with an individual experiencing diarrhea or vomiting in the previous  
212 week were more likely to experience an astrovirus AGE episode than those with no  
213 such contact (HR=9.08, 95% CI 5.77-14.29) (Table 2).

214

215 We also analyzed clinical characteristics and risk factors between non-astrovirus AGE  
216 episodes, initial astrovirus episodes, and subsequent astrovirus episodes (Table 3).  
217 Diarrhea was more common in initial astrovirus episodes (100%) than subsequent  
218 astrovirus episodes (67%) and non-astrovirus AGE episodes (95%). Conversely, fever  
219 was more prevalent in subsequent versus initial astrovirus episodes (49% v. 56%), while  
220 fever was less common still in non-astrovirus AGE episodes (39%) (Table 3).  
221 Nevertheless, healthcare utilization was more common among subsequent astrovirus  
222 episodes compared to initial astrovirus episodes and non-astrovirus episodes (Table 3).  
223 Additionally, children were more than twice as likely to receive zinc in a repeat astrovirus  
224 AGE episode, compared to an initial episode (67% v. 24%). Coinfection incidence was

225 similar among initial and subsequent cases, except for sapovirus, which was more  
226 common among subsequent astrovirus episodes (22% v. 13%) (Table 3). Lastly, while  
227 having a toilet in the home appeared protective against future astrovirus AGE episodes  
228 (HR=0.19, 95% CI 0.04-0.91), no other baseline factors were associated with  
229 subsequent episodes.

230

231 Repeat episodes from different genotypes were observed in two children. One child had  
232 HAstV-4 AGE, followed by HAstV-2 AGE over a year later, experiencing diarrhea and  
233 vomiting of 5-6 days duration in the HAstV-2 episode, but no fever. The other child was  
234 infected initially with HAstV-1, and after 14 symptom-free days, HAstV-2. The HAstV-1  
235 episode was accompanied by diarrhea, vomiting and fever, while the HAstV-2 episode  
236 involved only diarrhea.

237

238 Most symptom prevalence, burden, and healthcare-seeking characteristics did not differ  
239 among HAstV-1, HAstV-2, HAstV-4, and HAstV-5 episodes (Table 4). We could not  
240 compare characteristics among HAstV-3 and HAstV-8, due to the small numbers of  
241 these episodes. Notably, even after eliminating extreme outliers in diarrhea duration (25  
242 days and 88 days) among HAstV-5 episodes, diarrhea lasted significantly longer in  
243 HAstV-5 episodes (median=13.5 days, IQR 10.5, 19.5 days) than episodes with HAstV-  
244 1, HAstV-2, and HAstV-4, where median duration did not exceed 8 days ( $p=0.02$ ).  
245 Additionally, the maximum diarrhea duration in HAstV-5 episodes (36 days), was more  
246 than 2 times that of all other genotypes (15 days). One-third of all children infected with

247 HAstV-5 were also infected with wild-type rotavirus, while only 1 additional rotavirus  
248 coinfection was identified in a child with HAstV-2. This difference was statistically  
249 significant ( $p=0.02$ ). The median age (IQR) at rotavirus/astrovirus co-infections was 14.6  
250 months (12.8-16.8 months). Norovirus GI was also more common in HAstV-1 episodes  
251 (32%) and HAstV-2 episodes (18%) than in HAstV-4 or HAstV-5 episodes (0%), though  
252 this difference was not statistically significant ( $p=0.07$ ). We also found that 8 (26%) of 31  
253 HAstV-1 episodes co-occurred with sapovirus.

254

## 255 **Discussion:**

256 Few longitudinal birth cohort studies have evaluated the risk of astrovirus in pediatric  
257 populations in low-and-middle-income (LMIC) countries[1,6,9–11,25]. Here, we present  
258 the first prospective study of symptomatic astrovirus infection burden in healthy children  
259 in Nicaragua, and only the second published study on astrovirus infection in  
260 Mesoamerica in almost 20 years[6,9,10,12,26–28]. Our findings identify potential  
261 genotype-specific differences in seasonal transmission, symptom duration, and  
262 probability of co-infections. Notably, though astrovirus has zoonotic potential, we were  
263 not able to detect non-human astrovirus genotypes with our primers, nor did we identify  
264 associations between astrovirus AGE and animals in the home. Unfortunately, we were  
265 unable to evaluate exposure to animals outside the home.

266

267 The incidence of astrovirus among AGE episodes (89/1710, 5.2%), was similar to birth  
268 cohorts from Nepal, Bangladesh, India, Pakistan, Peru, Brazil, South Africa, and

269 Tanzania who were followed for 2 years (all 5.6%)[1,25], lower than a birth cohort from  
270 Guatemala followed for 3 years (7.3%) and a birth cohort from Mexico followed for 3  
271 years (27.0), and higher than a birth cohort from Egypt followed for 3 years  
272 (3.5%)[1,6,11,25]. Notably, our study was conducted almost 20 years after the Egyptian,  
273 Mexican, and Guatemalan studies, during which hygiene and sanitation have improved  
274 worldwide[29]. Additionally, the molecular testing we used has higher sensitivity for  
275 pathogen detection than the ELISAs used for antigen detection in the previous studies.  
276 Nevertheless, many of our observations corroborate established evidence on astrovirus  
277 transmission. Like other tropical settings, most astrovirus episodes occurred during the  
278 rainy months of June and July[6,10,30,31], probably attributable to poorer sewage  
279 control, given astrovirus's fecal-oral route of transmission[3]. This pattern also mirrors  
280 sapovirus and norovirus transmission in León, which tends to predominate in the rainy  
281 season[32–34].

282

283 HAstV-1 was the most common genotype in our cohort, similar to other settings[2–  
284 4,11,28]. However, HAstV-1 was not detected during all months of astrovirus  
285 transmission, appearing only in June and July 2019. Children experiencing AGE during  
286 June and July 2019 were slightly older than children infected at other time points.  
287 Although children 18 months and older may have a higher risk of astrovirus AGE than  
288 younger children[35], the small differences in age among children infected in June and  
289 July 2019 compared to other times does not likely account for the increase in infections  
290 during this time. Thus, our findings suggest that astrovirus genotypes may exhibit  
291 seasonality.

292

293 The only other identified genotype to co-circulate with HAstV-1 was HAstV-2, another  
294 commonly-detected genotype worldwide[3]. In most other months, we could only detect  
295 a single HAstV genotype, although unknown genotypes were equally distributed in  
296 almost every month of transmission. Additionally, HAstV-5 comprised almost 15% of all  
297 typed genotypes, and 11% of all initial episodes. While HAstV-5 is typically not as  
298 widespread as HAstV-1, it was common in studies from Nepal, Egypt, China, and the  
299 US, comprising 16-42% of astrovirus-positive genotypes[11,25,36,37]. Surprisingly, we  
300 also found that diarrhea lasted longer in children infected with HAstV-5. Genotype-  
301 specific astrovirus infection severity is an understudied area[38]. To our knowledge, only  
302 one other study analyzed genotype-specific symptom severity and found that HAstV-3  
303 was associated with persistent diarrhea in previously-healthy children[39].

304

305 We also find that co-infections with wild-type rotavirus were more common among  
306 HAstV-5 episodes than among other genotypes. In Shanghai, China, patients infected  
307 with HAstV-1 and HAstV-5 were more likely to be co-infected with another enteric virus  
308 than patients infected with HAstV-2, HAstV-3, HAstV-4, or HAstV-8. However, most of  
309 these coinfections existed between norovirus and astrovirus[36], unlike our findings.  
310 While rotavirus and astrovirus coinfections commonly occur as coinfections in studies of  
311 gastroenteritis epidemiology[40,41], it is not known whether certain HAstV genotypes  
312 are more prompt to co-infections with rotavirus. Given that that astrovirus co-infections  
313 with norovirus GI (12 episodes) and sapovirus (10 episodes) were more common  
314 overall than astrovirus/rotavirus co-infections, and that norovirus and sapovirus most

315 commonly co-occurred with HAstV-1 episodes, our data seem to suggest that different  
316 HAstV genotypes may have different propensities for co-infection with other enteric  
317 pathogens. This is another poorly-understood area that deserves further study[3].

318

319 Like Guix and colleagues[42] and Cortez and colleagues[37], we identified isolated  
320 cases of repeated astrovirus episodes of different genotypes, suggesting that different  
321 astrovirus genotypes may not offer complete cross-protective immunity[3]. Subsequent  
322 episodes in the 9 children with >1 astrovirus episode (7 with untyped episodes) were  
323 accompanied by fewer and shorter symptoms. However proportionally more children  
324 received zinc, intravenous fluids and hospital care in subsequent rather than initial  
325 episodes, conversely suggesting more clinically severe infections. Although our study  
326 was strengthened by the large number of children we followed for 3 years, we were  
327 limited by our inability to screen for asymptomatic astrovirus infections. It is possible that  
328 undetected asymptomatic astrovirus exposure early in life protected children from  
329 multiple subsequent episodes, limiting our ability to investigate whether astrovirus  
330 genotypes offer cross-protection against other genotypes. Future longitudinal studies  
331 should consider including astrovirus serology and asymptomatic astrovirus infections to  
332 clarify whether astrovirus serotypes offer cross-protection.

333

334 Astrovirus is spread through the fecal-oral route among infectious individuals[43] and  
335 through contaminated food[44], making control and prevention difficult, especially in  
336 congregate settings including schools and nursing homes[43]. Although baseline food

337 and sanitary factors were not associated with initial astrovirus AGE in our study, we  
338 found that having a toilet in the home was protective against a subsequent astrovirus  
339 episode. Children who did not develop astrovirus were also exclusively breastfed for  
340 longer than children who became infected, consistent with findings from the 8-country  
341 MAL-ED study which identified a protective effect of prolonging exclusive breastfeeding  
342 on astrovirus infection[45]. We also found that breastmilk in mothers of infected children  
343 had greater average concentrations of the  $\alpha$ -1,2 fucosylated HMO LNFP-I than the milk  
344 from mothers of uninfected children. A 3-country sub-analysis of the MAL-ED cohort  
345 demonstrated increased risk of astrovirus in children of mothers expressing the  
346 fucosyltransferase-3 (FUT3) gene[29], which also influences HMO composition[46].  
347 However, LNFP-I production is driven more by expression of fucosyltransferase-2  
348 (FUT2), which was not associated with astrovirus risk in the MAL-ED sub-cohort[29].  
349 Although not statistically significant, we also observed that infected children were non-  
350 exclusively breastfed for longer than uninfected children. This finding is consistent with  
351 LNFP-I as a potential risk factor for astrovirus. HMOs can impact children's health even  
352 after children are introduced to other foods[19]. The effects of HMOs on the gut  
353 microbiome could explain why LNFP-I was associated with astrovirus AGE, even though  
354 current breastfeeding was not associated with the onset of astrovirus AGE. Most of the  
355 mothers in our cohort expressed FUT2, leading to a higher concentration of LNFP-I in  
356 breastmilk (unpublished data). Children who were breastfed for longer periods would  
357 conceivably have more exposure to LNFP-I than children who were breastfed for a  
358 shorter period of time. If LNFP-I is associated with a greater incidence of astrovirus,  
359 children who were weaned later would be expected to have a higher risk of AGE.



360 However, well-controlled observational studies and randomized trials of lab-synthesized  
361 HMOs are needed to determine whether HMOs play any role in astrovirus AGE.

362

363 Strengths of our study include its prospective design, 36-month follow-up with weekly  
364 diarrheal surveillance from birth, and its recruitment of community-dwelling children.  
365 Risk factors collected prospectively, with frequent follow-up, are less likely to be affected  
366 by recall bias. Our community-based design is potentially more generalizable and less  
367 prone to selection bias and over-estimation of astrovirus prevalence and risk factors  
368 than hospital or clinic-based studies. Additionally, we were able identify the genotype for  
369 a majority of astrovirus episodes, allowing us to compare seasonal variation in  
370 astrovirus serotype incidence and any differences in astrovirus symptom severity or co-  
371 infection incidence between serotypes. Unfortunately, we could not type all astrovirus  
372 episodes, and we did not assess for co-infections with bacteria or parasites. Thus, it is  
373 possible that symptoms observed during a so-called “astrovirus episode” were actually  
374 caused by a different pathogen. With a sample size of 443, we may have been under-  
375 powered to detect some differences, although we analyzed a larger sample than other  
376 birth cohorts in Central America[6,9]. Although we found a protective relationship  
377 between exclusive breastfeeding and astrovirus AGE, we also found that an HMO  
378 commonly found in the milk of FUT2-positive mothers was associated with an increased  
379 risk of astrovirus AGE. A future case-control study with incidence density control  
380 sampling, nested within a prospective cohort, could address these questions. Lastly,  
381 while our results are likely generalizable to urban settings on the Pacific Coast of

382 Nicaragua, our findings may not explain astrovirus epidemiology in other areas of the  
383 country or region.

384

385 Our findings provide an estimate of astrovirus AGE risk in a community of healthy  
386 children in Central America, where few studies of astrovirus have been conducted. Our  
387 data also generate hypotheses about genotype-specific differences in astrovirus natural  
388 history and co-infections, as well as the role of HMOs in infection. Larger studies in  
389 Central America and other LMIC settings are needed to better understand the impact of  
390 astrovirus infections on child health and its prevention in regions with a high burden of  
391 diarrheal disease.

392

**Table 1. Baseline characteristics of astrovirus AGE relative to non-cases in a birth cohort in León, Nicaragua<sup>a</sup>**

| <b>Characteristic</b>                                      | <b>Astrovirus AGE<br/>(n=80)</b> | <b>Non-cases<br/>(n=363)</b> | <b>p*</b> |
|------------------------------------------------------------|----------------------------------|------------------------------|-----------|
| <b>n (%) or mean (standard deviation)</b>                  |                                  |                              |           |
| <b>Birth and Genetic Characteristics</b>                   |                                  |                              |           |
| Female sex                                                 | 33 (41%)                         | 184 (51%)                    | 0.1       |
| Mean birthweight in grams (2 missing)                      | 3,148 (460.8)                    | 3,123 (438.7)                | 0.7       |
| Mean age of mother years at child's birth                  | 23.2 (5.1)                       | 23.8 (5.3)                   | 0.3       |
| Born by vaginal delivery                                   | 43 (54%)                         | 199 (55%)                    | 0.9       |
| <b>Socioeconomic Indicators &amp; Household Sanitation</b> |                                  |                              |           |

|                                                                 |          |           |     |
|-----------------------------------------------------------------|----------|-----------|-----|
| Mother completed any secondary or higher education (12 missing) | 63 (79%) | 273 (75%) | 0.4 |
| Mother employed at time of child's birth                        | 13 (16%) | 60 (17%)  | 0.8 |
| Presence of a toilet in the home                                | 62 (78%) | 261 (72%) | 0.3 |
| Presence of a dirt floor in the home                            | 27 (34%) | 107 (29%) | 0.5 |
| Piped municipal water in the home                               | 68 (85%) | 304 (84%) | 0.8 |

---

### Nutrition Factors

---

|                                                   |                 |                 |         |
|---------------------------------------------------|-----------------|-----------------|---------|
| Mean weeks of exclusive breastfeeding             | 0.07 (0.3)      | 0.3 (0.4)       | <0.0001 |
| Mean weeks of any breastfeeding                   | 82 (58.6)       | 69.0 (58.2)     | 0.07    |
| Human milk oligosaccharide concentrations (µg/mL) |                 |                 |         |
| 2_FL                                              | 3059.9 (1644.3) | 2848.9 (1685.7) | 0.3     |
| 3FL                                               | 508.4 (663.3)   | 526.9 (475.3)   | 0.8     |
| DFLac                                             | 338.8 (346.1)   | 322.2 (314.9)   | 0.7     |
| 3_SL                                              | 153.3 (115.3)   | 163.4 (148.4)   | 0.5     |
| 6_SL                                              | 607.8 (294.8)   | 554.5 (271.4)   | 0.1     |
| LNT                                               | 749.2 (494.6)   | 761.0 (524.2)   | 0.9     |
| LNnT                                              | 171.2 (89.0)    | 171.7 (95.7)    | 1       |
| LNFP_I                                            | 1354.7 (902.1)  | 1114.6 (801.3)  | 0.02    |
| LNFP_II                                           | 672.1 (495.0)   | 706.6 (478.3)   | 0.6     |
| LNFP_III                                          | 65.6 (63.6)     | 59.2 (46.1)     | 0.4     |
| LSTb                                              | 117.5 (85.8)    | 104.9 (64.6)    | 0.2     |
| LSTc                                              | 362.9 (212.8)   | 320.6 (198.4)   | 0.1     |
| DFLNT                                             | 1056.5 (809.8)  | 992.7 (809.2)   | 0.5     |
| LNH                                               | 172.5 (96.3)    | 175.1 (111.8)   | 0.9     |

|        |               |               |     |
|--------|---------------|---------------|-----|
| DSLNT  | 228.7 (152.2) | 206.9 (127.8) | 0.2 |
| FLNH   | 298.3 (151.4) | 329.1 (202.2) | 0.1 |
| DFLNH  | 121.5 (123.4) | 115.5 (97.0)  | 0.6 |
| FDSLNH | 250.2 (220.4) | 284.9 (232.0) | 0.2 |
| DSLNH  | 282.0 (169.0) | 259.2 (148.9) | 0.2 |

\*Mantel-Haenszel chi-squared test for categorical variables; Student t-test

for continuous variables

393

394

**Table 2. Correlates of symptomatic astrovirus-positive gastroenteritis in a Nicaraguan birth cohort (n=443)**

| <b>Characteristic</b>                                      | <b>Hazard ratio (95% confidence interval)</b> |
|------------------------------------------------------------|-----------------------------------------------|
| <b>Birth Characteristics</b>                               |                                               |
| Female sex                                                 | 0.69 (0.45, 1.07)                             |
| Vaginal delivery                                           | 1.02 (0.66, 1.58)                             |
| Mean age of mother (years) at child's birth                | 0.99 (0.95, 1.04)                             |
| <b>Socioeconomic Indicators &amp; Household Sanitation</b> |                                               |
| Mother completed any secondary education or more           | 1.22 (0.69, 2.18)                             |
| Mother employed at time of child's birth                   | 0.86 (0.61, 1.19)                             |
| Crowding in the home (>2.5 people/bedroom)                 | 0.85 (0.52, 1.39)                             |
| Presence of a dirt floor in the home                       | 1.22 (0.77, 1.94)                             |
| Presence of an indoor toilet in the home                   | 1.23 (0.74, 2.05)                             |
| Piped municipal water in the home                          | 1.15 (0.62, 2.13)                             |

|                                                          |                   |
|----------------------------------------------------------|-------------------|
| Experienced a water source interruption in the past week | 0.90 (0.48, 1.70) |
| Animals in the home (any)                                | 0.83 (0.52, 1.31) |
| Dog                                                      | 0.85 (0.55, 1.31) |
| Cat                                                      | 1.17 (0.73, 1.88) |
| Chickens                                                 | 0.70 (0.40, 1.20) |
| Pig                                                      | 0.31 (0.08, 1.25) |
| Bird                                                     | 0.67 (0.29, 1.53) |
| Other, including horses and/or ducks                     | 0.84 (0.37, 1.93) |

---

### **Nutrition**

---

|                                                             |                   |
|-------------------------------------------------------------|-------------------|
| Currently breastfed                                         | 1.01 (0.95, 1.07) |
| Currently receiving foods or liquids other than breastmilk  | 1.00 (0.89, 1.13) |
| Ate uncooked fruit/vegetable in the past week               | 0.98 (0.78, 1.24) |
| Ate seafood in the past week                                | 1.00 (0.92, 1.09) |
| Ate outside the home in the past week                       | 1.01 (0.96, 1.06) |
| Shared a bottle or cup with another person in the past week | 0.99 (0.87, 1.12) |

---

### **Interpersonal Contact**

---

|                                                                            |                    |
|----------------------------------------------------------------------------|--------------------|
| Attended a social event in the past week                                   | 1.00 (0.92, 1.09)  |
| Attended childcare in the past week                                        | 1.04 (1.02, 1.06)  |
| Met/played with a child outside the home in the past week                  | 0.99 (0.98, 1.00)  |
| Used public transportation in the past week                                | 1.01 (0.96, 1.06)  |
| Went swimming in the past week                                             | 0.98 (0.76, 1.26)  |
| Had contact with any person with diarrhea and/or vomiting in the past week | 9.08 (5.77, 14.29) |

---

395

396

**Table 3. Clinical characteristics of astrovirus-positive gastroenteritis episodes in a birth cohort in León, Nicaragua**

| Clinical characteristic                                            | N (%) or Median (interquartile range)              |                             |                                              |
|--------------------------------------------------------------------|----------------------------------------------------|-----------------------------|----------------------------------------------|
|                                                                    | Non-<br>astrovirus<br>AGE<br>(n=1367) <sup>a</sup> | First<br>episodes<br>(n=80) | Subsequent<br>episodes <sup>b</sup><br>(n=9) |
| Diarrhea                                                           | 1303 (95%)                                         | 80 (100%)                   | 6 (67%)                                      |
| Median duration in days                                            | 6 (4-9)                                            | 6 (3-9)                     | 4 (1-5)                                      |
| Median number of stools in a 24-hour<br>period                     | 5 (4-7)                                            | 5 (2)                       | 5 (7.5)                                      |
| Vomiting                                                           | 352 (26%)                                          | 24 (30%)                    | 3 (33%)                                      |
| Median duration in days                                            | 2 (2-4)                                            | 1 (1-2)                     | 1 (1-3)                                      |
| Fever                                                              | 535 (39%)                                          | 39 (49%)                    | 5 (56%)                                      |
| Median gastroenteritis severity score<br>(scale 0-15) <sup>c</sup> | 5 (4-6)                                            | 5 (4-7)                     | 5 (2.5-7)                                    |
| Received care at primary care clinic                               | 479 (35%)                                          | 19 (24%)                    | 3 (33%)                                      |
| Received care at emergency department                              | 151 (11%)                                          | 4 (5%)                      | 1 (8%)                                       |
| Admitted to hospital                                               | 59 (4%)                                            | 2 (3%)                      | 1 (8%)                                       |
| Received zinc                                                      | 423 (31%)                                          | 19 (24%)                    | 6 (67%)                                      |
| Received intravenous fluid                                         | 52 (4%)                                            | 1 (1%)                      | 1 (8%)                                       |
| Co-infection with other gastrointestinal<br>viruses                |                                                    |                             |                                              |
| Norovirus GI                                                       | Not assessed (NA)                                  | 13 (16%)                    | 1 (8%)                                       |
| Norovirus GII                                                      | NA                                                 | 4 (5%)                      | 0                                            |

|           |    |          |         |
|-----------|----|----------|---------|
| Rotavirus | NA | 6 (8%)   | 1 (8%)  |
| Sapovirus | NA | 10 (13%) | 2 (22%) |

<sup>a</sup>Non-astrovirus AGE episodes were defined as episodes of symptomatic AGE where we tested for astrovirus RNA in stool but did not find it.

<sup>b</sup>8 children experienced a second episode, and one child experienced a third episode.

<sup>c</sup>Severity score calculated based on duration of diarrhea and or vomiting symptoms, the maximum number of stools reported per day, presence of fever, and receipt of intravenous fluid for dehydration. Adapted from the scale developed by Lee, et al.[22]

397

**Table 4. Characteristics of astrovirus-positive gastroenteritis episodes by astrovirus genotype in a Nicaraguan birth cohort (n=59).**

| Characteristic                              | N (%) or                     |                |                |               | Test                 | P-value |
|---------------------------------------------|------------------------------|----------------|----------------|---------------|----------------------|---------|
|                                             | Median (interquartile range) | HAstV-1 (n=31) | HAstV-2 (n=11) | HAstV-4 (n=8) |                      |         |
| Presence of Diarrhea                        | 31 (100.0)                   | 11 (100.0)     | 8 (100.0)      | 9 (100.0)     | Fisher's Exact Test  | 1.0     |
| Median duration of diarrhea (days)          | 8 (5-10)                     | 5 (3-9)        | 6.5 (3-8)      | 15 (11-21)    | Kruskall-Wallis Test | 0.02    |
| Median number of stools in a 24-hour period | 5 (4-7)                      | 5 (4-6)        | 5 (4-6)        | 6 (5-7.5)     | Kruskal-Wallis Test  | 0.53    |
| Vomiting                                    | 7 (22.6)                     | 2 (18.2)       | 3 (37.5)       | 1 (11.1)      | Fisher's Exact Test  | 0.83    |
| Median duration of vomiting (days)          | 2 (2-3)                      | 3 (3-3)        | 2 (2-6)        | 18 (18-18)    | Kruskal-Wallis Test  | 0.21    |

|                                       |           |          |          |          |                     |      |
|---------------------------------------|-----------|----------|----------|----------|---------------------|------|
| Fever                                 | 16 (51.6) | 4 (36.7) | 6 (75.0) | 3 (33.3) | Fisher's Exact Test | 0.3  |
| Received care at primary care clinic  | 12 (38.7) | 2 (18.2) | 2 (25.0) | 2 (22.2) | Fisher's Exact Test | 0.63 |
| Received care at emergency department | 2 (6.5)   | 2 (18.2) | 1 (12.5) | 0 (0.0)  | Fisher's Exact Test | 0.42 |
| Admitted to hospital                  | 1 (3.2)   | 1 (9.1)  | 0 (0.0)  | 0 (0.0)  | Fisher's Exact Test | 0.73 |
| Received intravenous fluid            | 0 (0.0)   | 1 (9.1)  | 0 (0.0)  | 0 (0.0)  | Fisher's Exact Test | 0.48 |
| Received zinc                         | 11 (35.5) | 4 (36.4) | 5 (62.5) | 0 (0.0)  | Fisher's Exact Test | 0.09 |

398

399

400

401 **A.**

402

403

404

405

406

407

408

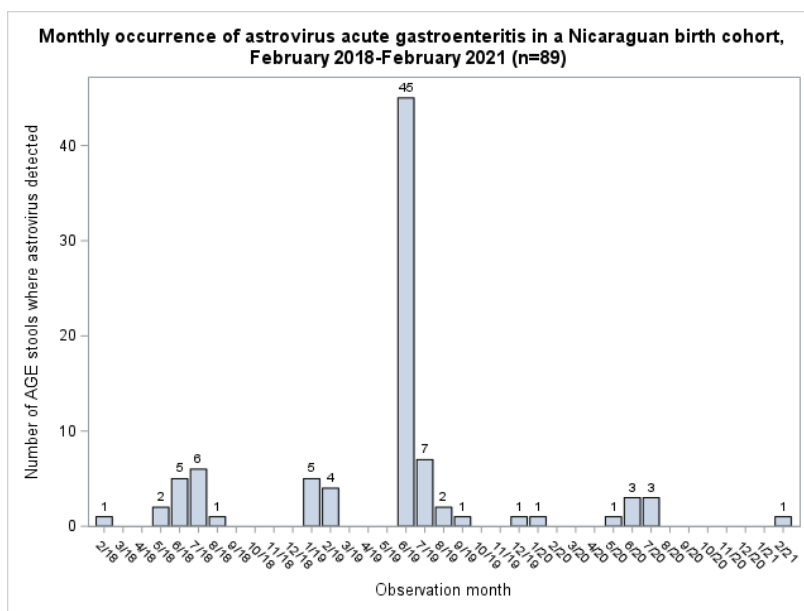



409 **B.**

410

411

412

413

414

415

416

417

418

419

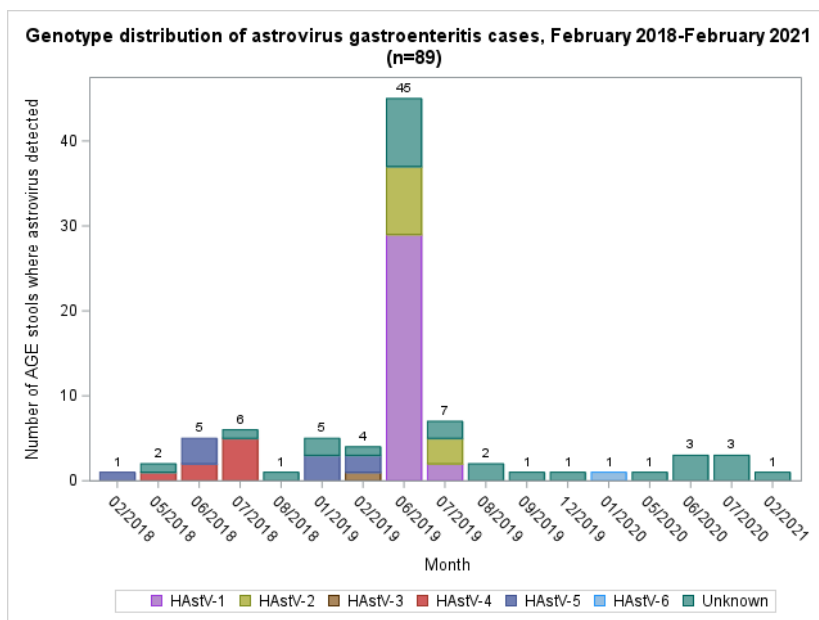

420 **Figure.** Monthly frequency of astrovirus infection a) for all astrovirus-positive gastroenteritis

421 episodes and b) stratified by genotype in a Nicaraguan birth cohort.

422

423 **Acknowledgments:** We are very grateful to the parents and children who participated

424 in the Sapovirus-Associated Gastro-Enteritis cohort. This work would not have been

425 possible without our dedicated field and laboratory team members: Merling Balmaceda,

426 Vanessa Bolaños, Nancy Corea, Jhosselyng Delgado, Marvel Fuentes, Yadira

427 Hernandez, Llurvin Madriz, Patricia Mendez, Yuvielka Martinez, Maria Mendoza, Ruth

428 Neira, Xiomara Obando, Veronica Pravia, Yorling Picado, Aura Scott and Mileydis Soto.

429 We also extend our thanks to the local Ministry of Health office in León and the staff of

430 the Perla Maria Norori Health Center for their support in recruiting study participants.

431 We also thank Mark Sotir for reviewing our manuscript.

432

433 **Data availability statement:** The raw data supporting the conclusions of this article will  
434 be made available by the authors, without undue reservation.

435

436 **Author contributions:** RJR, NAV, FB, SBD, JV, SV, YR, and CTV contributed to the  
437 conception and design of the study. YR, FG, LG, CTR, LB, JV, SV, FB, and NAV  
438 generated and analyzed the data. NAV, KH, and RJR performed the statistical analysis.  
439 RJR wrote the first draft of the manuscript. All authors contributed to the article and  
440 approved the submitted version. S.V, L.G, C.T-R and Y.R are former researchers from  
441 their cited primary affiliation. Credits are given because the majority of the research was  
442 performed while affiliated there.

443

444 **Funding:** Funding for the SAGE study and salary support for SBD, FB, CT-R, LG, SV,  
445 NAV, YR, and FG were supported by the National Institute of Allergy and Infectious  
446 Diseases (NIAID), National Institutes of Health (NIH), through Grant Award  
447 R01AI127845. An international research capacity-building award from the Fogarty  
448 International Center (FIC), NIH D43TW010923 provided additional salary support for  
449 FG, YR, and LG. SV and SBD. were supported by K24AI141744 from the NIAID. RJR  
450 has been funded by the NIH in 2018–2020 (2 T32GM 8719), and from 2022–present  
451 (5T32DK007634), as well as the UNC Graduate School, GlaxoSmithKline, and CERobs,  
452 LLC.

453

454 **Conflicts of interest:** The authors declare that the research was conducted in the  
455 absence of any commercial or financial relationships that could be construed as a  
456 potential conflict of interest.

457

458 **Corresponding Author Address:**

459 Rebecca Rubinstein

460 McGavran-Greenberg Hall

461 Chapel Hill, NC 27599

462 [Rebecca\\_rubinstein@med.unc.edu](mailto:Rebecca_rubinstein@med.unc.edu)

463

464

465

466

467 **References:**

- 468 1. Olortegui MP, Rouhani S, Yori PP, et al. Astrovirus Infection and Diarrhea in 8 Countries.  
469 *Pediatrics*. **2018**; 141(1):e20171326.
- 470 2. Bosch A, Guix S, Pintó RM. Epidemiology of Human Astroviruses. In: Schultz-Cherry S,  
471 editor. *Astrovirus Res Essent Ideas Everyday Impacts Future Dir* [Internet]. New York, NY:  
472 Springer; 2013 [cited 2020 Apr 1]. p. 1–18. Available from: [https://doi.org/10.1007/978-1-](https://doi.org/10.1007/978-1-4614-4735-1_1)  
473 [4614-4735-1\\_1](https://doi.org/10.1007/978-1-4614-4735-1_1)
- 474 3. Cortez V, Meliopoulos VA, Karlsson EA, Hargest V, Johnson C, Schultz-Cherry S.  
475 *Astrovirus Biology and Pathogenesis*. *Annu Rev Virol*. **2017**; 4(1):327–348.
- 476 4. Vu D-L, Cordey S, Brito F, Kaiser L. Novel human astroviruses: Novel human diseases? *J*  
477 *Clin Virol*. **2016**; 82:56–63.

- 478 5. Walter JE, Mitchell DK. Astrovirus infection in children. *Curr Opin Infect Dis.* **2003**;  
479 16(3):247–253.
- 480 6. Cruz JR, Bartlett AV, Herrmann JE, Cáceres P, Blacklow NR, Cano F. Astrovirus-  
481 associated diarrhea among Guatemalan ambulatory rural children. *J Clin Microbiol.* **1992**;  
482 30(5):1140–1144.
- 483 7. Babkin IV, Tikunov AY, Zhirakovskaia EV, Netesov SV, Tikunova NV. High evolutionary rate  
484 of human astrovirus. *Infect Genet Evol.* **2012**; 12(2):435–442.
- 485 8. Roach SN, Langlois RA. Intra- and Cross-Species Transmission of Astroviruses. *Viruses.*  
486 **2021**; 13(6):1127.
- 487 9. Walter JE, Mitchell DK, Guerrero ML, et al. Molecular Epidemiology of Human Astrovirus  
488 Diarrhea among Children from a Periurban Community of Mexico City. *J Infect Dis.* **2001**;  
489 183(5):681–686.
- 490 10. Maldonado Y, Cantwell M, Old M, et al. Population-Based Prevalence of Symptomatic and  
491 Asymptomatic Astrovirus Infection in Rural Mayan Infants. *J Infect Dis.* **1998**; 178(2):334–  
492 339.
- 493 11. Naficy AB, Rao MR, Holmes JL, et al. Astrovirus Diarrhea in Egyptian Children. *J Infect*  
494 *Dis.* **2000**; 182(3):685–690.
- 495 12. Diez-Valcarce M, Lopez MR, Lopez B, et al. Prevalence and genetic diversity of viral  
496 gastroenteritis viruses in children younger than 5 years of age in Guatemala, 2014–2015. *J*  
497 *Clin Virol.* **2019**; 114:6–11.
- 498 13. Vielot NA, González F, Reyes Y, et al. Risk Factors and Clinical Profile of Sapovirus-  
499 associated Acute Gastroenteritis in Early Childhood: A Nicaraguan Birth Cohort Study. *Ped*  
500 *Infect J. LWW*; **2021**; 40(3):220–226.
- 501 14. Reyes Y, González F, Gutierrez L, et al. Secretor status strongly influences the incidence  
502 of symptomatic norovirus infection in a genotype-dependent manner in a Nicaraguan birth  
503 cohort. *J Infect Dis.* **2021**; :jjab316.
- 504 15. Liu J, Gratz J, Amour C, et al. A Laboratory-Developed TaqMan Array Card for  
505 Simultaneous Detection of 19 Enteropathogens. *J Clin Microbiol.* **2013**; 51(2):472–480.
- 506 16. Noel JS, Lee TW, Kurtz JB, Glass RI, Monroe SS. Typing of human astroviruses from  
507 clinical isolates by enzyme immunoassay and nucleotide sequencing. *J Clin Microbiol.*  
508 **1995**; 33(4):797–801.
- 509 17. Oka T, Katayama K, Hansman GS, et al. Detection of human sapovirus by real-time  
510 reverse transcription-polymerase chain reaction. *J Med Virol.* **2006**; 78(10):1347–1353.
- 511 18. Freeman MM, Kerin T, Hull J, McCaustland K, Gentsch J. Enhancement of detection and  
512 quantification of rotavirus in stool using a modified real-time RT-PCR assay. *J Med Virol.*  
513 **2008**; 80(8):1489–1496.

- 514 19. Lagström H, Rautava S, Ollila H, et al. Associations between human milk oligosaccharides  
515 and growth in infancy and early childhood. *Am J Clin Nutr.* **2020**; 111(4):769–778.
- 516 20. Alderete TL, Autran C, Brekke BE, et al. Associations between human milk  
517 oligosaccharides and infant body composition in the first 6 mo of life. *Am J Clin Nutr.* **2015**;  
518 102(6):1381–1388.
- 519 21. Larsson MW, Lind MV, Laursen RP, et al. Human Milk Oligosaccharide Composition Is  
520 Associated With Excessive Weight Gain During Exclusive Breastfeeding-An Explorative  
521 Study. *Front Pediatr.* **2019**; 7:297.
- 522 22. Lee G, Peñataro Yori P, Paredes Olortegui M, et al. An instrument for the assessment of  
523 diarrhoeal severity based on a longitudinal community-based study. *BMJ Open.* **2014**;  
524 4(6):e004816.
- 525 23. Prentice RL, Williams BJ, Peterson AV. On the regression analysis of multivariate failure  
526 time data. *Biometrika.* **1981**; 68(2):373–379.
- 527 24. World Bank Group. Nicaragua - Climatology | Climate Change Knowledge Portal [Internet].  
528 [cited 2023 May 4]. Available from:  
529 <https://climateknowledgeportal.worldbank.org/country/nicaragua/climate-data-historical>
- 530 25. Shrestha SK, Shrestha J, Andreassen AK, Strand TA, Dudman S, Dembinski JL. Genetic  
531 Diversity of Astrovirus in Children From a Birth Cohort in Nepal. *Front Microbiol.* **2021**;  
532 11:588707.
- 533 26. Lorenzana I, Reyes M, Ehrnst A, Hedlund K-O. Respiratory Infection and Iatrogenic  
534 Diarrhea in Honduras and El Salvador during the 1991–1992 Season. *Am J Trop Med Hyg.*  
535 **1996**; 54(3):260–264.
- 536 27. Ortiz J, Boza AF. Molecular characterization of enteric viruses causing childhood diarrhea  
537 in Tegucigalpa, Honduras. *Int J Infect Dis.* **2012**; 16:e198.
- 538 28. Méndez-Toss M, Griffin DD, Calva J, et al. Prevalence and genetic diversity of human  
539 astroviruses in Mexican children with symptomatic and asymptomatic infections. *J Clin*  
540 *Microbiol.* **2004**; 42(1):151–157.
- 541 29. Colston JM, Francois R, Pisanic N, et al. Effects of Child and Maternal Histo-Blood Group  
542 Antigen Status on Symptomatic and Asymptomatic Enteric Infections in Early Childhood. *J*  
543 *Infect Dis.* Oxford Academic; **2019**; 220(1):151–162.
- 544 30. Gamsonré Z, Bisseye C, Nitiema LW, et al. Astrovirus Gastroenteritis in Children Younger  
545 than 5 Years in Ouagadougou (Burkina Faso): Prevalence and Risks Factors Influencing  
546 Severity. *Int J Trop Dis Health.* **2019**; :1–10.
- 547 31. Nguyen TA, Hoang L, Pham LD, et al. Identification of human astrovirus infections among  
548 children with acute gastroenteritis in the Southern Part of Vietnam during 2005–2006. *J*  
549 *Med Virol.* **2008**; 80(2):298–305.

- 550 32. Vielot NA, François R, Huseynova E, et al. Association between breastfeeding, host  
551 genetic factors, and calicivirus gastroenteritis in a Nicaraguan birth cohort. Tohma K, editor.  
552 PLOS ONE. **2022**; 17(10):e0267689.
- 553 33. Bucardo F, Nordgren J, Carlsson B, et al. Pediatric norovirus diarrhea in Nicaragua. J Clin  
554 Microbiol. **2008**; 46(8):2573–2580.
- 555 34. Bucardo F, Reyes Y, Becker-Dreps S, et al. Pediatric norovirus GII.4 infections in  
556 Nicaragua, 1999–2015. Infect Genet Evol J Mol Epidemiol Evol Genet Infect Dis. **2017**;  
557 55:305–312.
- 558 35. Nguekeng Tsague B, Mikounou Louya V, Ntoui F, et al. Occurrence of human astrovirus  
559 associated with gastroenteritis among Congolese children in Brazzaville, Republic of  
560 Congo. Int J Infect Dis. **2020**; 95:142–147.
- 561 36. Wu L, Teng Z, Lin Q, et al. Epidemiology and Genetic Characterization of Classical Human  
562 Astrovirus Infection in Shanghai, 2015–2016. Front Microbiol. **2020**; 11:570541.
- 563 37. Cortez V, Freiden P, Gu Z, Adderson E, Hayden R, Schultz-Cherry S. Persistent Infections  
564 with Diverse Co-Circulating Astroviruses in Pediatric Oncology Patients, Memphis,  
565 Tennessee, USA. Emerg Infect Dis. **2017**; 23(2):288–290.
- 566 38. Padron Regalado E. Molecular Epidemiology of Viral Gastroenteritis in Hajj pilgrimage  
567 [Internet]. [Thuwal, Kingdom of Saudi Arabia]: King Abdullah University of Science and  
568 Technology; 2014. Available from: <https://repository.kaust.edu.sa/handle/10754/316701>
- 569 39. Caballero S, Guix S, El-Senousy WM, Calicó I, Pintó RM, Bosch A. Persistent  
570 gastroenteritis in children infected with astrovirus: Association with serotype-3 strains:  
571 Persistent Astrovirus Gastroenteritis. J Med Virol. **2003**; 71(2):245–250.
- 572 40. Kumthip K, Khamrin P, Ushijima H, Maneekarn N. Molecular epidemiology of classic, MLB  
573 and VA astroviruses isolated from <5 year-old children with gastroenteritis in Thailand,  
574 2011–2016. Infect Genet Evol J Mol Epidemiol Evol Genet Infect Dis. **2018**; 65:373–379.
- 575 41. Levidiotou S, Gartzonika C, Papaventsis D, et al. Viral agents of acute gastroenteritis in  
576 hospitalized children in Greece. Clin Microbiol Infect. **2009**; 15(6):596–598.
- 577 42. Guix S, Caballero S, Villena C, et al. Molecular Epidemiology of Astrovirus Infection in  
578 Barcelona, Spain. J Clin Microbiol. **2002**; 40(1):133–139.
- 579 43. Thongprachum A, Khamrin P, Maneekarn N, Hayakawa S, Ushijima H. Epidemiology of  
580 gastroenteritis viruses in Japan: Prevalence, seasonality, and outbreak. J Med Virol. **2016**;  
581 88(4):551–570.
- 582 44. Iritani N, Kaida A, Abe N, et al. Detection and genetic characterization of human enteric  
583 viruses in oyster-associated gastroenteritis outbreaks between 2001 and 2012 in Osaka  
584 City, Japan. J Med Virol. **2014**; 86(12):2019–2025.
- 585 45. McCormick BJ, Richard SA, Murray-Kolb LE, et al. Full breastfeeding protection against  
586 common enteric bacteria and viruses: results from the MAL-ED cohort study. Am J Clin  
587 Nutr. **2022**; 115(3):759–769.

588 46. Bode L, Jantscher-Krenn E. Structure-function relationships of human milk  
589 oligosaccharides. *Adv Nutr Bethesda Md.* **2012**; 3(3):383S–91S.

590
